# Supplementary material for: Analysis of Global Gene Expression in Brachypodium distachyon Reveals Extensive Network Plasticity in Response to Abiotic Stress
Source: PubMed Central journal article supplement (PMC3906199; doi:10.1371/journal.pone.0087499), 2014-01-29

**Supplemental Figure S1.**  
Principal component analysis of RMA normalized microarrays.

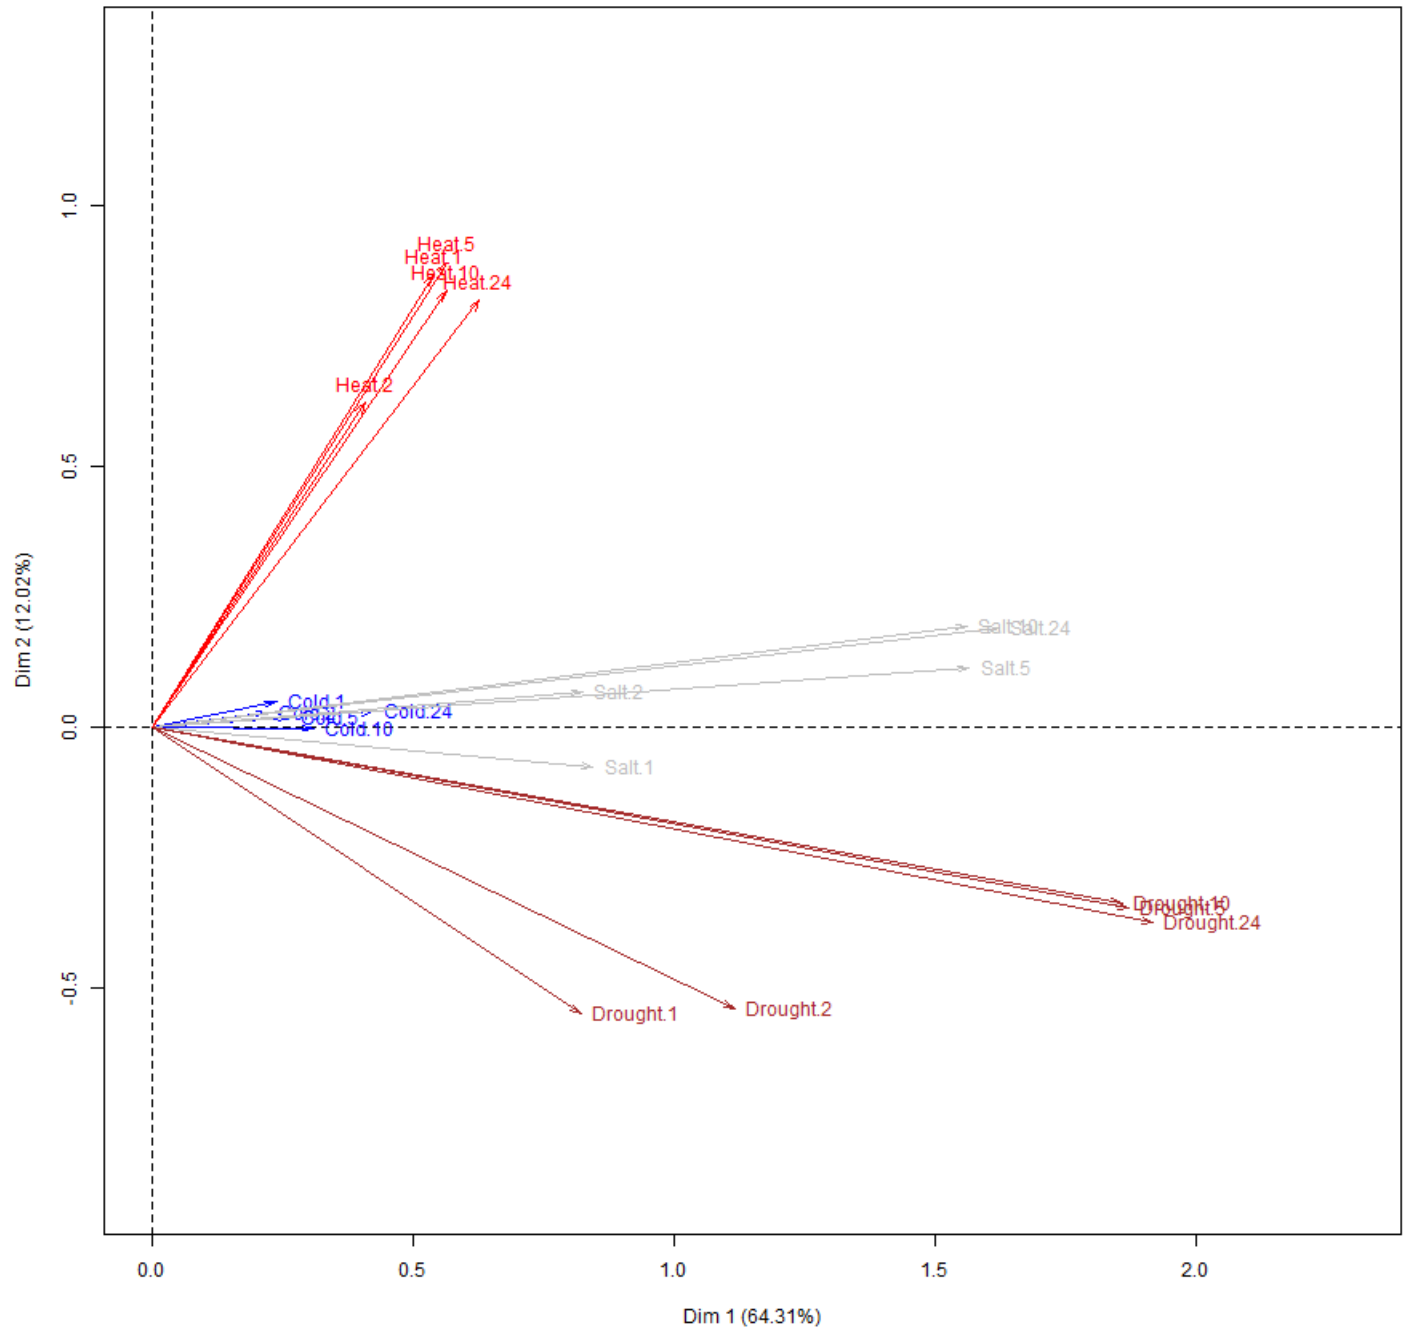

Supplement: pone.0087499.s001.pdf [file pone.0087499.s001.pdf]
